# Supplementary material for: Global deforestation rates deviate from a profit-oriented baseline
Source: Research Square preprint supplement (doi:10.21203/rs.3.rs-7461473/v1), 2025-09-17
Supplement: Supplementary file 2 [file 3dde1e110d9a79be382d9f58.xlsx]

## Sheet: Products and profits
			Profits (US$ per hectare per year)							Variation coefficient [% of the profit]			Standard deviation, sd, of the profits (US$ per hectare per year)
Country	LULC	Crops/Products	period_1	period_2	period_3	period_4	period_5	period_6	period_7	RMSE from trend line	Calibrated 2001-2004	Calibrated 2010-2014	period_1	period_2	period_3	period_4	period_5	period_6	period_7
Argentina	other_land	NA	0	0	0	0	0	0	0	0			0	0	0	0	0	0	0
Argentina	planted_forests	Timber	98	119	138	157	174	191	207	40			39.2	47.6	55.2	62.8	69.6	76.4	82.8
Argentina	arable_land	Soya beans; maize; wheat	149	181	219	256	271	287	303	10			14.9	18.1	21.9	25.6	27.1	28.7	30.3
Argentina	perm_crops	Grapes; Lemons and limes	487	892	1172	906	530	709	888	27			131.49	240.84	316.44	244.62	143.1	191.43	239.76
Argentina	perm_meadows	Meat and milk	150	96	139	182	215	230	245	20			30	19.2	27.8	36.4	43	46	49
Argentina	deforestation	Meat and milk	150	96	139	182	215	230	245		65		97.5	62.4	90.35	118.3	139.75	149.5	159.25
Argentina	natural_forest	Timber	30	44	58	71	83	95	106		30		9	13.2	17.4	21.3	24.9	28.5	31.8
Bolivia	other_land	NA	0	0	0	0	0	0	0	0			0	0	0	0	0	0	0
Bolivia	planted_forests	Timber	98	119	138	157	174	191	207	40			39.2	47.6	55.2	62.8	69.6	76.4	82.8
Bolivia	arable_land	Sugar cane; soya beans; potatoes	81	93	105	117	130	142	154	6			4.86	5.58	6.3	7.02	7.8	8.52	9.24
Bolivia	perm_crops	Plantains and cooking bananas; bananas; oranges	96	147	199	250	301	353	404	15			14.4	22.05	29.85	37.5	45.15	52.95	60.6
Bolivia	perm_meadows	Meat and milk	60	82	123	177	240	304	364	6			3.6	4.92	7.38	10.62	14.4	18.24	21.84
Bolivia	deforestation	Meat and milk	60	82	123	177	240	304	364		60		36	49.2	73.8	106.2	144	182.4	218.4
Bolivia	natural_forest	Timber	30	44	58	71	83	95	106		30		9	13.2	17.4	21.3	24.9	28.5	31.8
Brazil	other_land	NA	0	0	0	0	0	0	0	0			0	0	0	0	0	0	0
Brazil	planted_forests	Timber	98	119	138	157	174	191	207	40			39.2	47.6	55.2	62.8	69.6	76.4	82.8
Brazil	arable_land	Sugar cane; soya beans; maize (corn)	331	412	439	428	394	354	322	16			52.96	65.92	70.24	68.48	63.04	56.64	51.52
Brazil	perm_crops	Coffee	46	70	93	117	140	164	187	10			4.6	7	9.3	11.7	14	16.4	18.7
Brazil	perm_meadows	Meat and milk	96	125	153	180	205	230	253	4			3.84	5	6.12	7.2	8.2	9.2	10.12
Brazil	deforestation	Meat and milk	96	125	153	180	205	230	253		50		48	62.5	76.5	90	102.5	115	126.5
Brazil	natural_forest	Timber	30	44	58	71	83	95	106		30		9	13.2	17.4	21.3	24.9	28.5	31.8
Colombia	other_land	NA	0	0	0	0	0	0	0	0			0	0	0	0	0	0	0
Colombia	planted_forests	Timber	98	119	138	157	174	191	207	40			39.2	47.6	55.2	62.8	69.6	76.4	82.8
Colombia	arable_land	Sugar cane; potatoes	267	304	340	376	413	449	485	20			53.4	60.8	68	75.2	82.6	89.8	97
Colombia	perm_crops	Oil palm fruit; Platains and cooking bananas; coffe	1164	1352	1540	1728	1915	2102	2288	12			139.68	162.24	184.8	207.36	229.8	252.24	274.56
Colombia	perm_meadows	Meat and milk	93	125	157	193	233	280	336	6			5.58	7.5	9.42	11.58	13.98	16.8	20.16
Colombia	deforestation	Meat and milk	93	125	157	193	233	280	336		55		51.15	68.75	86.35	106.15	128.15	154	184.8
Colombia	natural_forest	Timber	30	44	58	71	83	95	106		25		7.5	11	14.5	17.75	20.75	23.75	26.5
Ecuador	other_land	NA	0	0	0	0	0	0	0	0			0	0	0	0	0	0	0
Ecuador	planted_forests	Timber	98	119	138	157	174	191	272	40			39.2	47.6	55.2	62.8	69.6	76.4	108.8
Ecuador	arable_land	Sugar cane; soya beans; maize (corn)	378.9	283.9	299	369.15	438.5	553.75	669	26			98.514	73.814	77.74	95.979	114.01	143.975	173.94
Ecuador	perm_crops	Coffee	1118.95	1241.11	1285	1250.6	1137.95	947.01	1130	43			481.149	533.677	552.55	537.758	489.318	407.214	485.9
Ecuador	perm_meadows	Meat and milk	94.6	141.03	173.3	191.43	195	185.23	224	10			9.46	14.103	17.33	19.143	19.5	18.523	22.4
Ecuador	deforestation	Meat and milk	94.6	141.03	173.3	191.43	195	185.23	224		50		47.3	70.515	86.65	95.715	97.5	92.615	112
Ecuador	natural_forest	Timber	30	44	58	71	83	95	124		35		10.5	15.4	20.3	24.85	29.05	33.25	43.4
Mexico	other_land	NA	0	0	0	0	0	0	0	0			0	0	0	0	0	0	0
Mexico	planted_forests	Timber	98	119	138	157	174	191	207	40			39.2	47.6	55.2	62.8	69.6	76.4	82.8
Mexico	arable_land	Sugar cane; Maize (corn)	195	220	246	271	296	321	346	4			7.8	8.8	9.84	10.84	11.84	12.84	13.84
Mexico	perm_crops	Oranges; bananas; lemons and limes; avocados	188	270	351	433	515	596	678	10			18.8	27	35.1	43.3	51.5	59.6	67.8
Mexico	perm_meadows	Meat and milk	64	98	132	168	207	248	292	3			1.92	2.94	3.96	5.04	6.21	7.44	8.76
Mexico	deforestation	Meat and milk	64	98	132	168	207	248	292		60		38.4	58.8	79.2	100.8	124.2	148.8	175.2
Mexico	natural_forest	Timber	30	44	58	71	83	95	106		25		7.5	11	14.5	17.75	20.75	23.75	26.5
Nicaragua	other_land	NA	0	0	0	0	0	0	0	0			0	0	0	0	0	0	0
Nicaragua	planted_forests	Timber	98	119	138	157	174	191	207	40			39.2	47.6	55.2	62.8	69.6	76.4	82.8
Nicaragua	arable_land	Sugar cane; Maize	26	53	80	106	133	159	186	18			4.68	9.54	14.4	19.08	23.94	28.62	33.48
Nicaragua	perm_crops	Oil palm fruit; Platains and cooking bananas; coffe	33	127	283	439	596	752	908	45			14.85	57.15	127.35	197.55	268.2	338.4	408.6
Nicaragua	perm_meadows	Meat and milk	60	74	118	183	260	339	412	6			3.6	4.44	7.08	10.98	15.6	20.34	24.72
Nicaragua	deforestation	Meat and milk	60	74	118	183	260	339	412		60		36	44.4	70.8	109.8	156	203.4	247.2
Nicaragua	natural_forest	Timber	30	44	58	71	83	95	106		45		13.5	19.8	26.1	31.95	37.35	42.75	47.7
Paraguay	other_land	NA	0	0	0	0	0	0	0	0			0	0	0	0	0	0	0
Paraguay	planted_forests	Timber	98	119	138	157	174	191	207	40			39.2	47.6	55.2	62.8	69.6	76.4	82.8
Paraguay	arable_land	Soya beans; sugar cane; cassava	134	198	258	314	366	414	458	25			33.5	49.5	64.5	78.5	91.5	103.5	114.5
Paraguay	perm_crops	Oranges; Oil palm; mate leaves	603	640	677	714	750	787	824	12			72.36	76.8	81.24	85.68	90	94.44	98.88
Paraguay	perm_meadows	Meat and milk	119	121	141	176	220	269	319	11			13.09	13.31	15.51	19.36	24.2	29.59	35.09
Paraguay	deforestation	Meat and milk	119	121	141	176	220	269	319		45		53.55	54.45	63.45	79.2	99	121.05	143.55
Paraguay	natural_forest	Timber	30	44	58	71	83	95	106		33		9.9	14.52	19.14	23.43	27.39	31.35	34.98
Peru	other_land	NA	0	0	0	0	0	0	0	0			0	0	0	0	0	0	0
Peru	planted_forests	Timber	98	119	138	157	174	191	207	40			39.2	47.6	55.2	62.8	69.6	76.4	82.8
Peru	arable_land	Sugar cane; potatoes; rice	71	91	134	157	193	226	242	6			4.26	5.46	8.04	9.42	11.58	13.56	14.52
Peru	perm_crops	Bananas; platains and cooking bananas; oranges; grapes	246	316	386	455	525	594	663	24			59.04	75.84	92.64	109.2	126	142.56	159.12
Peru	perm_meadows	Meat and milk	95	141	173	191	195	185	161	10			9.5	14.1	17.3	19.1	19.5	18.5	16.1
Peru	deforestation	Meat and milk	95	141	173	191	195	185	161		60	45	57	84.6	103.8	114.6	87.75	83.25	72.45
Peru	natural_forest	Timber	30	44	58	71	83	95	106		20	20	6	8.8	11.6	14.2	16.6	19	21.2
Venezuela	other_land	NA	0	0	0	0	0	0	0	0			0	0	0	0	0	0	0
Venezuela	planted_forests	Timber	98.338	119	138	157	174	191	207	40			106.912	47.6	55.2	62.8	69.6	76.4	82.8
Venezuela	arable_land	Sugar cane; potatoes	267.28	303.64	340	376.36	412.72	449.08	485.44	20			232.773	60.728	68	75.272	82.544	89.816	97.088
Venezuela	perm_crops	Oil palm fruit; Platains and cooking bananas; coffe	1163.87	1352.36	1540.39	1727.94	1915.03	2101.66	2287.82	12			17.76	162.284	184.847	207.353	229.804	252.199	274.538
Venezuela	perm_meadows	Meat and milk	148	179	211	244	278	313	349	12			17.76	21.48	25.32	29.28	33.36	37.56	41.88
Venezuela	deforestation	Meat and milk	148	179	211	244	278	313	349		60		17.7655	107.4	126.6	146.4	166.8	187.8	209.4
Venezuela	natural_forest	Timber	29.6092	44	58	71	83	95	106		20		5.92183	8.8	11.6	14.2	16.6	19	21.2
Angola	other_land	NA	0	0	0	0	0	0	0	0			0	0	0	0	0	0	0
Angola	planted_forests	Timber	111	142	172	201	228	253	278	40			44.4	56.8	68.8	80.4	91.2	101.2	111.2
Angola	arable_land	Cassava fresh; Maize (corn)	54	539	876	1067	1111	1008	758	18			9.72	97.02	157.68	192.06	199.98	181.44	136.44
Angola	perm_crops	Bananas; Pineapples	701	1158	1545	1863	2111	2290	2400	20			140.2	231.6	309	372.6	422.2	458	480
Angola	perm_meadows	Meat and milk	82	105	121	132	141	152	168	10			8.2	10.5	12.1	13.2	14.1	15.2	16.8
Angola	deforestation	Meat and milk	82	105	121	132	141	152	168		60	60	49.2	63	72.6	79.2	84.6	91.2	100.8
Angola	natural_forest	Timber	65	73	80	87	94	100	107		20	28	13	14.6	16	17.4	26.32	28	29.96
Cameroon	other_land	NA	0	0	0	0	0	0	0	0			0	0	0	0	0	0	0
Cameroon	planted_forests	Timber	111	142	172	201	228	253	278	40			44.4	56.8	68.8	80.4	91.2	101.2	111.2
Cameroon	arable_land	Cassava fresh; Maize (corn); Taro; Sugar cane; Sorghum	105	84	114	176	251	321	367	8			8.4	6.72	9.12	14.08	20.08	25.68	29.36
Cameroon	perm_crops	Platains and cooking bananas; Oil palm fruit	377	322	394	548	743	936	1083	5			18.85	16.1	19.7	27.4	37.15	46.8	54.15
Cameroon	perm_meadows	Meat and milk	116	125	162	219	288	358	422	12			13.92	15	19.44	26.28	34.56	42.96	50.64
Cameroon	deforestation	Meat and milk	116	125	162	219	288	358	422		50	50	58	62.5	81	109.5	144	179	211
Cameroon	natural_forest	Timber	65	73	80	87	94	100	107		35	36	22.75	25.55	28	30.45	33.84	36	38.52
Côte d'Ivoire	other_land	NA	0	0	0	0	0	0	0	0			0	0	0	0	0	0	0
Côte d'Ivoire	planted_forests	Timber	111	142	172	201	228	253	278	40			44.4	56.8	68.8	80.4	91.2	101.2	111.2
Côte d'Ivoire	arable_land	Yams; Cassava fresh; Sugar cane	131	163	186	200	206	203	191	11			14.41	17.93	20.46	22	22.66	22.33	21.01
Côte d'Ivoire	perm_crops	Oil palm fruit; Platains and cooking bananas; Cocoa beans	765	946	1065	1120	1111	1040	904	7			53.55	66.22	74.55	78.4	77.77	72.8	63.28
Côte d'Ivoire	perm_meadows	Meat and milk	106	118	131	153	191	253	347	4			4.24	4.72	5.24	6.12	7.64	10.12	13.88
Côte d'Ivoire	deforestation	Meat and milk	106	118	131	153	191	253	347		40	40	42.4	47.2	52.4	61.2	76.4	101.2	138.8
Côte d'Ivoire	natural_forest	Timber	65	73	80	87	94	100	107		35	50	22.75	25.55	28	30.45	47	50	53.5
DR Congo	other_land	NA	0	0	0	0	0	0	0	0		0	0	0	0	0	0	0	0
DR Congo	planted_forests	Timber	111	142	172	201	228	253	278	40		44	44.4	56.8	68.8	80.4	100.32	111.32	122.32
DR Congo	arable_land	Cassava; maize; sugarcane	291	351	399	434	456	466	464	16		18	46.56	56.16	63.84	69.44	82.08	83.88	83.52
DR Congo	perm_crops	Plantains; bananas; palm oil	290	340	379	408	425	432	427	10		11	29	34	37.9	40.8	46.75	47.52	46.97
DR Congo	perm_meadows	Meat and milk	187	193	199	205	210	215	220	4		4	7.48	7.72	7.96	8.2	8.4	8.6	8.8
DR Congo	deforestation	Meat and milk	187	193	199	205	210	215	220		50	55	93.5	96.5	99.5	102.5	115.5	118.25	121
DR Congo	natural_forest	Timber	65	73	80	87	94	100	107		35	39	22.75	25.55	28	30.45	36.66	39	41.73
Ethiopia	other_land	NA	0	0	0	0	0	0	0	0			0	0	0	0	0	0	0
Ethiopia	planted_forests	Timber	111	142	172	201	228	253	278	35			38.85	49.7	60.2	70.35	79.8	88.55	97.3
Ethiopia	arable_land	Maize (corn); Wheat; Sorghum; Barley; Sugar cane	220	162	180	368	653	960	1214	11			24.2	17.82	19.8	40.48	71.83	105.6	133.54
Ethiopia	perm_crops	Bananas; Coffee; Other fruits	183	236	370	504	638	772	906	23			42.09	54.28	85.1	115.92	146.74	177.56	208.38
Ethiopia	perm_meadows	Meat and milk	98	137	227	306	372	428	471	12			11.76	16.44	27.24	36.72	44.64	51.36	56.52
Ethiopia	deforestation	Meat and milk	98	137	227	306	372	428	471		50		49	68.5	113.5	153	186	214	235.5
Ethiopia	natural_forest	Timber	65	73	80	87	94	100	107		0		0	0	0	0	0	0	0
Madagascar	other_land	NA	0	0	0	0	0	0	0	0			0	0	0	0	0	0	0
Madagascar	planted_forests	Timber	111	142	172	201	228	253	278	35			38.85	49.7	60.2	70.35	79.8	88.55	97.3
Madagascar	arable_land	Rice; Cassava; Sugar cane	51	64	74	83	91	97	101	18			9.18	11.52	13.32	14.94	16.38	17.46	18.18
Madagascar	perm_crops	Bananas; Mangoes; guavas and mangosteens; Coffee; Cocoa beans	300	289	391	568	779	987	1151	15			45	43.35	58.65	85.2	116.85	148.05	172.65
Madagascar	perm_meadows	Meat and milk	89	90	91	92	93	94	95	14			12.46	12.6	12.74	12.88	13.02	13.16	13.3
Madagascar	deforestation	Meat and milk	89	90	91	92	93	94	95		45	45	40.05	40.5	40.95	41.4	41.85	42.3	42.75
Madagascar	natural_forest	Timber	65	73	80	87	94	100	107		30	50	19.5	21.9	24	26.1	47	50	53.5
Mozambique	other_land	NA	0	0	0	0	0	0	0	0			0	0	0	0	0	0	0
Mozambique	planted_forests	Timber	111	142	172	201	228	253	278	35			38.85	49.7	60.2	70.35	79.8	88.55	97.3
Mozambique	arable_land	Cassava fresh; Sugar cane; Maize (corn)	137	161	186	211	236	260	285	45			61.65	72.45	83.7	94.95	106.2	117	128.25
Mozambique	perm_crops	Coconuts in shell; Bananas	838	819	781	727	655	567	461	16			134.08	131.04	124.96	116.32	104.8	90.72	73.76
Mozambique	perm_meadows	Meat and milk	115	146	150	148	161	213	325	16			18.4	23.36	24	23.68	25.76	34.08	52
Mozambique	deforestation	Meat and milk	115	146	150	148	161	213	325		60	60	69	87.6	90	88.8	96.6	127.8	195
Mozambique	natural_forest	Timber	65	73	80	87	94	100	107		20	28	13	14.6	16	17.4	18.8	20	21.4
Nigeria	other_land	NA	0	0	0	0	0	0	0	0			0	0	0	0	0	0	0
Nigeria	planted_forests	Timber	111	142	172	201	228	253	278	35			38.85	49.7	60.2	70.35	79.8	88.55	97.3
Nigeria	arable_land	Cassava fresh; Yams; Maize (corn); Sorghum	337	392	448	503	559	614	670	11			37.07	43.12	49.28	55.33	61.49	67.54	73.7
Nigeria	perm_crops	Other citrus fruit; Plantains and cooking bananas; Pineapples	361	391	420	448	475	502	528	6			21.66	23.46	25.2	26.88	28.5	30.12	31.68
Nigeria	perm_meadows	Meat and milk	102	177	235	280	315	345	372	6			6.12	10.62	14.1	16.8	18.9	20.7	22.32
Nigeria	deforestation	Meat and milk	102	177	235	280	315	345	372		50		51	88.5	117.5	140	157.5	172.5	186
Nigeria	natural_forest	Timber	65	73	80	87	94	100	107		10		6.5	7.3	8	8.7	9.4	10	10.7
R Congo	other_land	NA	0	0	0	0	0	0	0	0			0	0	0	0	0	0	0
R Congo	planted_forests	Timber	111	142	172	201	228	253	278	35			38.85	49.7	60.2	70.35	79.8	88.55	97.3
R Congo	arable_land	Cassava fresh; Sugar cane	85	130	175	219	264	309	354	31			26.35	40.3	54.25	67.89	81.84	95.79	109.74
R Congo	perm_crops	Plantains and cooking bananas; Bananas; Mangoes; Other fruits; Avocados	595	904	1111	1218	1225	1131	936	9			53.55	81.36	99.99	109.62	110.25	101.79	84.24
R Congo	perm_meadows	Meat and milk	99	132	164	197	229	262	294	14			13.86	18.48	22.96	27.58	32.06	36.68	41.16
R Congo	deforestation	Meat and milk	99	132	164	197	229	262	294		50		49.5	66	82	98.5	114.5	131	147
R Congo	natural_forest	Timber	65	73	80	87	94	100	107		10		6.5	7.3	8	8.7	9.4	10	10.7
Tanzania	other_land	NA	0	0	0	0	0	0	0	0			0	0	0	0	0	0	0
Tanzania	planted_forests	Timber	111	142	172	201	228	253	278	35			38.85	49.7	60.2	70.35	79.8	88.55	97.3
Tanzania	arable_land	Cassava fresh; Maize (corn); Sweet potatoes; Rice; Potatoes; Beans dry	100	111	121	132	143	154	165	21			21	23.31	25.41	27.72	30.03	32.34	34.65
Tanzania	perm_crops	Bananas; Plantains and cooking bananas; Coconuts in shell	87	89	126	196	300	437	608	30			26.1	26.7	37.8	58.8	90	131.1	182.4
Tanzania	perm_meadows	Meat and milk	64	97	146	216	314	445	616	10			6.4	9.7	14.6	21.6	31.4	44.5	61.6
Tanzania	deforestation	Meat and milk	64	97	146	216	314	445	616		50		32	48.5	73	108	157	222.5	308
Tanzania	natural_forest	Timber	65	73	80	87	94	100	107		10		6.5	7.3	8	8.7	9.4	10	10.7
Zambia	other_land	NA	0	0	0	0	0	0	0	0			0	0	0	0	0	0	0
Zambia	planted_forests	Timber	111	142	172	201	228	253	278	35			38.85	49.7	60.2	70.35	79.8	88.55	97.3
Zambia	arable_land	Sugar cane; Maize (corn); Cassava fresh	179	277	355	412	449	464	459	17			30.43	47.09	60.35	70.04	76.33	78.88	78.03
Zambia	perm_crops	Bananas; Pineapples	701	1158	1545	1863	2111	2290	2400	20			140.2	231.6	309	372.6	422.2	458	480
Zambia	perm_meadows	Meat and milk	88	105	179	283	392	478	517	10			8.8	10.5	17.9	28.3	39.2	47.8	51.7
Zambia	deforestation	Meat and milk	88	105	179	283	392	478	517		50		44	52.5	89.5	141.5	196	239	258.5
Zambia	natural_forest	Timber	65	73	80	87	94	100	107		15		9.75	10.95	12	13.05	14.1	15	16.05
Indonesia	other_land	NA	0	0	0	0	0	0	0	0			0	0	0	0	0	0	0
Indonesia	planted_forests	Timber	226	236	246	255	264	272	280	59			133.34	139.24	145.14	150.45	155.76	160.48	165.2
Indonesia	arable_land	General crops	442	485	525	564	600	669	669	6			26.52	29.1	31.5	33.84	36	40.14	40.14
Indonesia	perm_crops	Permanent crops	1254	1286	1290	1265	1212	1130	1020	21			263.34	270.06	270.9	265.65	254.52	237.3	214.2
Indonesia	perm_meadows	Meat and milk	121	140	159	176	193	224	224	28			33.88	39.2	44.52	49.28	54.04	62.72	62.72
Indonesia	deforestation	Meat and milk	121	140	159	176	193	224	224		50		60.5	70	79.5	88	96.5	112	112
Indonesia	natural_forest	Timber	113	116	118	120	122	124	126		45		50.85	52.2	53.1	54	54.9	55.8	56.7
Cambodia	other_land	NA	0	0	0	0	0	0	0	0			0	0	0	0	0	0	0
Cambodia	planted_forests	Timber	226	236	246	255	264	272	280	59			133.34	139.24	145.14	150.45	155.76	160.48	165.2
Cambodia	arable_land	Rice; Cassava fresh	106	57	149	341	588	848	1078	11			11.66	6.27	16.39	37.51	64.68	93.28	118.58
Cambodia	perm_crops	Oil palm fruit; Bananas; Coconuts; Other fruits; Oranges	1443	1466	1488	1511	1533	1556	1578	33			476.19	483.78	491.04	498.63	505.89	513.48	520.74
Cambodia	perm_meadows	Meat and milk	196	232	226	197	161	137	143	12			23.52	27.84	27.12	23.64	19.32	16.44	17.16
Cambodia	deforestation	Meat and milk	196	232	226	197	161	137	143		50	50	98	116	113	98.5	80.5	68.5	71.5
Cambodia	natural_forest	Timber	113	116	118	120	122	124	126		30	40	33.9	34.8	35.4	36	48.8	49.6	50.4
Lao People's DR	other_land	NA	0	0	0	0	0	0	0	0			0	0	0	0	0	0	0
Lao People's DR	planted_forests	Timber	226	236	246	255	264	272	280	59			133.34	139.24	145.14	150.45	155.76	160.48	165.2
Lao People's DR	arable_land	Rice; Cassava fresh; Sugar cane	103	219	334	449	564	679	794	22			22.66	48.18	73.48	98.78	124.08	149.38	174.68
Lao People's DR	perm_crops	Bananas; Pineapples; Other fruits	317	400	484	567	650	733	816	20			63.4	80	96.8	113.4	130	146.6	163.2
Lao People's DR	perm_meadows	Meat and milk	83	156	204	241	286	354	461	17			14.11	26.52	34.68	40.97	48.62	60.18	78.37
Lao People's DR	deforestation	Meat and milk	83	156	204	241	286	354	461		60		49.8	93.6	122.4	144.6	171.6	212.4	276.6
Lao People's DR	natural_forest	Timber	113	116	118	120	122	124	126		25		28.25	29	29.5	30	30.5	31	31.5
Malaysia	other_land	NA	0	0	0	0	0	0	0	0			0	0	0	0	0	0	0
Malaysia	planted_forests	Timber	226	236	246	255	264	272	280	59			133.34	139.24	145.14	150.45	155.76	160.48	165.2
Malaysia	arable_land	Cassava fresh; Maize (corn); Rice; Soya beans; Sugar cane; Sweet potatoes	527	798	1005	1148	1226	1240	1192	13			68.51	103.74	130.65	149.24	159.38	161.2	154.96
Malaysia	perm_crops	Oil palm fruit; Coconuts	575	1085	1474	1742	1890	1916	1823	7			40.25	75.95	103.18	121.94	132.3	134.12	127.61
Malaysia	perm_meadows	Meat and milk	72	89	105	122	139	156	172	51			36.72	45.39	53.55	62.22	70.89	79.56	87.72
Malaysia	deforestation	Meat and milk	72	89	105	122	139	156	172		60		43.2	53.4	63	73.2	83.4	93.6	103.2
Malaysia	natural_forest	Timber	113	116	118	120	122	124	126		50		56.5	58	59	60	61	62	63
Myanmar	other_land	NA	0	0	0	0	0	0	0	0			0	0	0	0	0	0	0
Myanmar	planted_forests	Timber	226.044	236.191	245.816	254.972	263.702	272.044	280.031	59			133.366	139.352	145.032	150.434	155.584	160.506	165.218
Myanmar	arable_land	Cassava fresh; Maize (corn); Rice; Soya beans; Sugar cane; Sweet potatoes	508.665	574.032	629.48	675.009	710.619	736.311	752.083	4.24272			21.5812	24.3546	26.7071	28.6388	30.1496	31.2396	31.9088
Myanmar	perm_crops	Oil palm fruit; Coconuts	640.01	667.159	694.308	721.458	748.607	775.756	802.905	11.3412			72.5846	75.6636	78.7426	81.8216	84.9007	87.9797	91.0587
Myanmar	perm_meadows	Meat and milk	161.921	174.737	187.553	200.369	213.185	226.001	238.817	25.7765			41.7376	45.0411	48.3446	51.6481	54.9517	58.2552	61.5587
Myanmar	deforestation	Meat and milk	161.921	174.737	187.553	200.369	213.185	226.001	238.817		60	60	97.1526	104.842	112.532	120.221	127.911	135.601	143.29
Myanmar	natural_forest	Timber	113.246	115.687	118.002	120.204	122.304	124.31	126.231		30	37	33.9739	34.706	35.4006	36.0612	45.2524	45.9948	46.7056
Thailand	other_land	NA	0	0	0	0	0	0	0	0			0	0	0	0	0	0	0
Thailand	planted_forests	Timber	226	236	246	255	264	272	280	59			133.34	139.24	145.14	150.45	155.76	160.48	165.2
Thailand	arable_land	Sugar cane; Rice	76	81	85	89	94	98	102	8			6.08	6.48	6.8	7.12	7.52	7.84	8.16
Thailand	perm_crops	Oil palm fruit; Natural rubber; Pineapples; Oranges; Mangoes	577	981	1299	1531	1677	1737	1711	8			46.16	78.48	103.92	122.48	134.16	138.96	136.88
Thailand	perm_meadows	Meat and milk	162	175	188	200	213	226	239	26			42.12	45.5	48.88	52	55.38	58.76	62.14
Thailand	deforestation	Meat and milk	162	175	188	200	213	226	239		60		97.2	105	112.8	120	127.8	135.6	143.4
Thailand	natural_forest	Timber	113	116	118	120	122	124	126		20		22.6	23.2	23.6	24	24.4	24.8	25.2
Vietnam	other_land	NA	0	0	0	0	0	0	0	0			0	0	0	0	0	0	0
Vietnam	planted_forests	Timber	226	236	246	255	264	272	280	59			133.34	139.24	145.14	150.45	155.76	160.48	165.2
Vietnam	arable_land	Cabbages; Cassava fresh; Maize (corn); Rice; Soya beans; Sugar cane; Sweet potatoes	85	286	467	628	769	890	973	6			5.1	17.16	28.02	37.68	46.14	53.4	58.38
Vietnam	perm_crops	Bananas; Coconuts; Coffee; Natural rubber; Oranges; Pepper	630	938	1215	1461	1677	1861	1986	8			50.4	75.04	97.2	116.88	134.16	148.88	158.88
Vietnam	perm_meadows	Meat and milk	139	122	132	168	229	317	431	7			9.73	8.54	9.24	11.76	16.03	22.19	30.17
Vietnam	deforestation	Meat and milk	139	122	132	168	229	317	431		60	60	83.4	73.2	79.2	100.8	137.4	190.2	258.6
Vietnam	natural_forest	Timber	113	116	118	120	122	124	126		25	40	28.25	29	29.5	30	48.8	49.6	50.4

## Sheet: Upper and lower profit bounds
		Profit bounds (+m x sd)
	Country	Upside	Downside
1	Argentina	1	-2
2	Bolivia	1	-2
3	Brazil	1	-2
4	Colombia	1	-2
5	Ecuador	1	-2
6	Mexico	1	-2
7	Nicaragua	1	-2
8	Paraguay	1	-2
9	Peru	1	-2
10	Venezuela	1	-2
11	Angola	0.5	-2.5
12	Cameroon	1	-2
13	Cote d'Ivoire	1	-2
14	DR Congp	0.5	-2.5
15	Ethiopia	0	-3
16	Madagascar	0.5	-2.5
17	Mozambique	0.5	-2.5
18	Nigeria	0.5	-2.5
19	R Congo	0.5	-2.5
20	Tanzania	0.5	-2.5
21	Zambia	1	-2
22	Indonesia	1	-2
23	Cambodia	0.5	-2.5
24	Lao People's DR	0.5	-2.5
25	Malaysia	0.5	-2.5
26	Myanmar	0.5	-2.5
27	Thailand	0.5	-2.5
28	Vietnam	0.5	-2.5

## Sheet: Constraints expansion
Constrained proportions in future land-use/land-cover portfolios (T)		Minimum proportion 'other land'		Proportion 'planted forest'		Maximum proportion 'annual crops+permanent crops'					[%]
Country	LULC	In period 1990-1995	In period 2019-2023	In period 1990-1995	In period 2019-2023	In period 1990-1995	In period 2019-2023
Argentina	other_land	47	53
Argentina	planted_forests			1	1
Argentina	arable_land					15	21
Bolivia	other_land	17.5	22
Bolivia	planted_forests			0.1	0.2
Bolivia	arable_land					4.9	7.8
Brazil	other_land	12.1	16.3
Brazil	planted_forests			1.3	1.8
Brazil	arable_land					7.8	9.9
Colombia	other_land	6.8	11
Colombia	planted_forests			0.4	1.7
Colombia	arable_land					2.1	1.2
Ecuador	other_land	19.6	27.2
Ecuador	planted_forests			0.5	1.2
Ecuador	arable_land					10.1	13.8
Mexico	other_land	16.2	27.4
Mexico	planted_forests			0.1	0.1
Mexico	arable_land					12.9	14.6
Nicaragua	other_land	29.4	65.3
Nicaragua	planted_forests			0.6	1
Nicaragua	arable_land					12.5	14.2
Paraguay	other_land	18	28.2
Paraguay	planted_forests			0.4	2.3
Paraguay	arable_land					11	16.7
Peru	other_land	24.4	26.3
Peru	planted_forests			0.9	3.5
Peru	arable_land					4.8	6.5
Venezuela	other_land	23.2	33.2
Venezuela	planted_forests			1.5	4.9
Venezuela	arable_land					2.9	2.7
Angola	other_land	9.8	17.7
Angola	planted_forests			0.6	0.9
Angola	arable_land					4.3	6.3
Cameroon	other_land	36.3	37.5
Cameroon	planted_forests			0.1	0.4
Cameroon	arable_land					13.1	13.7
Côte d'Ivoire	other_land	21.9	31.1
Côte d'Ivoire	planted_forests			0	0.8
Côte d'Ivoire	arable_land					13	18.3
DR Congo	other_land	30	36.9
DR Congo	planted_forests			0	0
DR Congo	arable_land					5.9	8.8
Ethiopia	other_land	50.8	57.2
Ethiopia	planted_forests			1.1	3.5
Ethiopia	arable_land					4.4	17.2
Madagascar	other_land	8.3	9.4
Madagascar	planted_forests			0.5	0.7
Madagascar	arable_land					5.2	5.6
Mozambique	other_land	0.6	1.1
Mozambique	planted_forests			0.1	0.2
Mozambique	arable_land					7.2	10
Nigeria	other_land	6.4	8.6
Nigeria	planted_forests			0.3	0.4
Nigeria	arable_land					40.5	50.1
R Congo	other_land	4.6	5.5
R Congo	planted_forests			0.2	0.2
R Congo	arable_land					2.9	4.9
Tanzania	other_land	3.7	8.1
Tanzania	planted_forests			0.6	0.8
Tanzania	arable_land					15.2	20.3
Zambia	other_land	8.2	11.1
Zambia	planted_forests			0.1	0.1
Zambia	arable_land					5.1	6.3
Indonesia	other_land	17.4	20.2
Indonesia	planted_forests			2.7	3.3
Indonesia	arable_land					27.3	43.9
Indonesia	perm_crops
Cambodia	other_land	20	32.2
Cambodia	planted_forests			3.4	30.8
Cambodia	arable_land					23.3	25.4
Lao People's DR	other_land	18.6	22.2
Lao People's DR	planted_forests			7.7	8.4
Lao People's DR	arable_land					5.3	7.1
Malaysia	other_land	15.8	19
Malaysia	planted_forests			5.1	9.3
Malaysia	arable_land					25.2	30.6
Myanmar	other_land	36.4	39.2
Myanmar	planted_forests			0.8	2.4
Myanmar	arable_land					16.8	19.2
Thailand	other_land	15.5	18.6
Thailand	planted_forests			6.9	12.5
Thailand	arable_land					39.1	43.9
Vietnam	other_land	4.8	5.1
Vietnam	planted_forests			13.4	24.4
Vietnam	arable_land					36	52.4

## Sheet: Land-cover proportions 1990
	1990	Land-use/land-cover proportion				Country area	[FAOSTAT in 1000 ha]
Country	LULC
Argentina	other_land	0.405234				273669
Argentina	planted_forests	0.002799
Argentina	arable_land	0.0971064
Argentina	perm_crops	0.00372713
Argentina	perm_meadows	0.365295
Argentina	deforestation	0
Argentina	natural_forest	0.125838
Bolivia	other_land	0.139115				108330
Bolivia	planted_forests	0.000184621
Bolivia	arable_land	0.0193852
Bolivia	perm_crops	0.00143081
Bolivia	perm_meadows	0.306471
Bolivia	deforestation	0
Bolivia	natural_forest	0.533414
Brazil	other_land	0.0143764				835814
Brazil	planted_forests	0.00425693
Brazil	arable_land	0.0566394
Brazil	perm_crops	0.0109067
Brazil	perm_meadows	0.213497
Brazil	deforestation	0
Brazil	natural_forest	0.700323
Colombia	other_land	0.00819162				110950
Colombia	planted_forests	0.000874268
Colombia	arable_land	0.0297882
Colombia	perm_crops	0.0152772
Colombia	perm_meadows	0.361271
Colombia	deforestation	0
Colombia	natural_forest	0.584598
Ecuador	other_land	0.0949348				24836
Ecuador	planted_forests	0.00178894
Ecuador	arable_land	0.0645837
Ecuador	perm_crops	0.0531889
Ecuador	perm_meadows	0.19814
Ecuador	deforestation	0
Ecuador	natural_forest	0.587364
Mexico	other_land	0.0959508				194395
Mexico	planted_forests	0.000202834
Mexico	arable_land	0.111675
Mexico	perm_crops	0.0106896
Mexico	perm_meadows	0.41855
Mexico	deforestation	0
Mexico	natural_forest	0.362932
Nicaragua	other_land	0.133761				12034
Nicaragua	planted_forests	2.40984e-05
Nicaragua	arable_land	0.108027
Nicaragua	perm_crops	0.0162041
Nicaragua	perm_meadows	0.210238
Nicaragua	deforestation	0
Nicaragua	natural_forest	0.531746
Paraguay	other_land	0.00551225				39729.7
Paraguay	planted_forests	0.000256735
Paraguay	arable_land	0.0531089
Paraguay	perm_crops	0.00249939
Paraguay	perm_meadows	0.295889
Paraguay	deforestation	0
Paraguay	natural_forest	0.642733
Peru	other_land	0.225644				128000
Peru	planted_forests	0.00205469
Peru	arable_land	0.0320391
Peru	perm_crops	0.00509453
Peru	perm_meadows	0.139969
Peru	deforestation	0
Peru	natural_forest	0.595199
Venezuela	other_land	0.162338				88205
Venezuela	planted_forests	0.00482955
Venezuela	arable_land	0.032107
Venezuela	perm_crops	0.00882036
Venezuela	perm_meadows	0.206904
Venezuela	deforestation	0
Venezuela	natural_forest	0.585001
Angola	other_land	0.00762975				124670
Angola	planted_forests	0.00770515
Angola	arable_land	0.0232614
Angola	perm_crops	0.00160424
Angola	perm_meadows	0.331724
Angola	deforestation	0
Angola	natural_forest	0.628075
Cameroon	other_land	0.330033				47271
Cameroon	planted_forests	0.000382899
Cameroon	arable_land	0.125658
Cameroon	perm_crops	0.0260202
Cameroon	perm_meadows	0.0423092
Cameroon	deforestation	0
Cameroon	natural_forest	0.475596
Côte d'Ivoire	other_land	0.153831				31800
Côte d'Ivoire	planted_forests	0.000210692
Côte d'Ivoire	arable_land	0.076415
Côte d'Ivoire	perm_crops	0.114066
Côte d'Ivoire	perm_meadows	0.408805
Côte d'Ivoire	deforestation	0
Côte d'Ivoire	natural_forest	0.246673
DR Congo	other_land	0.221063				226705
DR Congo	planted_forests	0.000244812
DR Congo	arable_land	0.0294215
DR Congo	perm_crops	0.00524911
DR Congo	perm_meadows	0.0798394
DR Congo	deforestation	0
DR Congo	natural_forest	0.664183
Ethiopia	other_land	0.482209				112857
Ethiopia	planted_forests	0.00300913
Ethiopia	arable_land	0.11519
Ethiopia	perm_crops	0.00478483
Ethiopia	perm_meadows	0.226602
Ethiopia	deforestation	0
Ethiopia	natural_forest	0.168204
Madagascar	other_land	0.139898				58153.6
Madagascar	planted_forests	0.00397224
Madagascar	arable_land	0.0467727
Madagascar	perm_crops	0.0104035
Madagascar	perm_meadows	0.567463
Madagascar	deforestation	0
Madagascar	natural_forest	0.23149
Mozambique	other_land	0.00336988				78637.8
Mozambique	planted_forests	0.000483228
Mozambique	arable_land	0.043872
Mozambique	perm_crops	0.0029248
Mozambique	perm_meadows	0.398215
Mozambique	deforestation	0
Mozambique	natural_forest	0.551135
Nigeria	other_land	0.0640875				91077
Nigeria	planted_forests	0.00291292
Nigeria	arable_land	0.308245
Nigeria	perm_crops	0.0439189
Nigeria	perm_meadows	0.2925
Nigeria	deforestation	0
Nigeria	natural_forest	0.288336
R Congo	other_land	0.0385846				34150
R Congo	planted_forests	0.00174232
R Congo	arable_land	0.0140264
R Congo	perm_crops	0.00112152
R Congo	perm_meadows	0.292826
R Congo	deforestation	0
R Congo	natural_forest	0.651699
Tanzania	other_land	0.0169338				88580
Tanzania	planted_forests	0.00624294
Tanzania	arable_land	0.101603
Tanzania	perm_crops	0.0112892
Tanzania	perm_meadows	0.222285
Tanzania	deforestation	0
Tanzania	natural_forest	0.641646
Zambia	other_land	0.0822718				74339
Zambia	planted_forests	0.000766758
Zambia	arable_land	0.0388894
Zambia	perm_crops	0.000269038
Zambia	perm_meadows	0.240789
Zambia	deforestation	0
Zambia	natural_forest	0.637014
Indonesia	other_land	0.128488				187752
Indonesia	planted_forests	0.000774906
Indonesia	arable_land	0.107871
Indonesia	perm_crops	0.0624228
Indonesia	perm_meadows	0.0698262
Indonesia	deforestation	0
Indonesia	natural_forest	0.630617
Cambodia	other_land	0.12419				17652
Cambodia	planted_forests	0.00381203
Cambodia	arable_land	0.209325
Cambodia	perm_crops	0.00623159
Cambodia	perm_meadows	0.036823
Cambodia	deforestation	0
Cambodia	natural_forest	0.619618
Lao People's DR	other_land	0.154983				23080
Lao People's DR	planted_forests	0.0695841
Lao People's DR	arable_land	0.0346187
Lao People's DR	perm_crops	0.00264298
Lao People's DR	perm_meadows	0.034662
Lao People's DR	deforestation	0
Lao People's DR	natural_forest	0.70351
Malaysia	other_land	0.168458				32855
Malaysia	planted_forests	0.0579516
Malaysia	arable_land	0.198341
Malaysia	perm_crops	0
Malaysia	perm_meadows	0.00846142
Malaysia	deforestation	0
Malaysia	natural_forest	0.566787
Myanmar	other_land	0.240666				65267
Myanmar	planted_forests	0.000470376
Myanmar	arable_land	0.14525
Myanmar	perm_crops	0.00769148
Myanmar	perm_meadows	0.00550048
Myanmar	deforestation	0
Myanmar	natural_forest	0.600423
Thailand	other_land	0.20249				51089
Thailand	planted_forests	0.0336667
Thailand	arable_land	0.342422
Thailand	perm_crops	0.0608546
Thailand	perm_meadows	0.0152675
Thailand	deforestation	0
Thailand	natural_forest	0.345299
Vietnam	other_land	0.456328				32549
Vietnam	planted_forests	0.0228885
Vietnam	arable_land	0.196135
Vietnam	perm_crops	0.0321054
Vietnam	perm_meadows	0.0105072
Vietnam	deforestation	0
Vietnam	natural_forest	0.282036
